# Supplementary material for: The HEXACO Model in Education and Work
Source: Atypon-hosted journal article supplement (doi:10.1027/2151-2604/a000376), 2019-07-01
Supplement: 2151-2604_a000376_esm1.pdf [file 2151-2604_a000376_esm1.pdf]

**Electronic Supplementary Material for**  
**McAbee, S. T., Casillas, A. Way, J. D., & Guo, F. (2019). The HEXACO model in**  
**education and work: Current applications and future directions. *Zeitschrift für***  
***Psychologie*. <https://doi.org/10.1027/2151-2604/a000376>**

### Definitions of Elements of the Behavioral Skills Framework

| Dimension                                                                                                                                                                                 | Component                                                                                                                                                                                   | Subcomponent                                                                                                                                      |
|-------------------------------------------------------------------------------------------------------------------------------------------------------------------------------------------|---------------------------------------------------------------------------------------------------------------------------------------------------------------------------------------------|---------------------------------------------------------------------------------------------------------------------------------------------------|
| <b>Acting Honestly (Honesty-Humility)</b><br>Describes the extent to which a person values and adheres to ethical and moral standards of behavior, as well as personal level of humility. | <b>Genuineness</b><br>Being sincere and truthful in interactions, appropriately giving others credit, and acknowledging his/her mistakes.                                                   | <b>Truthfulness</b><br>Interacts with others in a straightforward, open, and truthful manner.                                                     |
|                                                                                                                                                                                           |                                                                                                                                                                                             | <b>Acceptance of Responsibility</b><br>Accepts responsibility for his or her actions, including giving others due credit when appropriate.        |
|                                                                                                                                                                                           | <b>Fairness</b><br>Acts in ways that are intended to be unbiased and fair to everyone.                                                                                                      | <b>Fairness</b><br>Acts in ways that are intended to be unbiased and fair to everyone.                                                            |
|                                                                                                                                                                                           | <b>Modesty</b><br>Avoids boasting or acting superior to others and is humble about achievements.                                                                                            | <b>Modesty</b><br>Avoids boasting or acting superior to others and is humble about achievements.                                                  |
| <b>Keeping an Open Mind (Openness to Experience)</b><br>Describes a person's level of open-mindedness and curiosity about a variety of ideas, beliefs, people, and experiences.           | <b>Creativity</b><br>Generating original ideas, using existing ideas or things in new ways, and having an active imagination.                                                               | <b>Originality</b><br>Generates new ideas related to tasks, processes, theories, etc.                                                             |
|                                                                                                                                                                                           |                                                                                                                                                                                             | <b>Active Imagination</b><br>Imagines and/or creates things that do not currently exist in the real world.                                        |
|                                                                                                                                                                                           | <b>Curiosity</b><br>Seeking out information to better understand a wide range of topic areas and/or obtaining a depth of understanding in one topic area that goes beyond what is required. | <b>Information Seeking</b><br>Asks questions and searches for information on a wide variety of topic areas.                                       |
|                                                                                                                                                                                           |                                                                                                                                                                                             | <b>Depth of Knowledge</b><br>Obtains a level of knowledge that goes beyond the minimum requirements related to performing required tasks.         |
|                                                                                                                                                                                           | <b>Flexibility</b><br>Adapting to new environments and making adjustments to accommodate changes.                                                                                           | <b>Environmental Adaptability</b><br>Adjusts his or her behavior to meet the requirements of different or unfamiliar situations and environments. |
|                                                                                                                                                                                           |                                                                                                                                                                                             | <b>Accommodation</b><br>Adjusts existing schedules or plans in order to accommodate changes to tasks and facilitate their completion.             |
|                                                                                                                                                                                           | <b>Accepting Differences</b><br>Being open-minded and accepting of ideas, cultures, and ways of doing things that are different from his/her own.                                           | <b>Open-mindedness</b><br>Keeps an open mind when encountering ideas, opinions, and thoughts that are different from his or her own.              |
|                                                                                                                                                                                           |                                                                                                                                                                                             | <b>Embracing Diversity</b><br>Shows an interest in and respect for people from different backgrounds and cultures.                                |

|                                                                                                                                                                                                   |                                                                                                                                                                                                 |                                                                                                                                                                     |
|---------------------------------------------------------------------------------------------------------------------------------------------------------------------------------------------------|-------------------------------------------------------------------------------------------------------------------------------------------------------------------------------------------------|---------------------------------------------------------------------------------------------------------------------------------------------------------------------|
| <p><b>Maintaining Composure (Emotionality)</b><br/>Describes the extent to which a person is relatively calm, serene, and able to manage emotions effectively.</p>                                | <p><b>Stress Tolerance</b><br/>The degree to which a person can control feelings of anxiety and other negative emotions in order to function effectively in a range of situations.</p>          | <p><b>Worry Management</b><br/>Does not allow anxiety and fear to impact the completion of daily activities or tasks.</p>                                           |
|                                                                                                                                                                                                   | <p><b>Self Confidence</b><br/>A tendency to be self-assured and to make decisions without needing a lot of input from others.</p>                                                               | <p><b>Negative Feeling Management</b><br/>Does not allow negative feelings (e.g., sadness, guilt, shame) to impact the completion of daily activities or tasks.</p> |
|                                                                                                                                                                                                   |                                                                                                                                                                                                 | <p><b>Decisiveness</b><br/>Makes his or her own decisions as appropriate.</p>                                                                                       |
|                                                                                                                                                                                                   |                                                                                                                                                                                                 | <p><b>Independence</b><br/>Works on tasks without needing a lot of support or guidance from others.</p>                                                             |
| <p><b>Socializing with Others (Extraversion)</b><br/>Describes a person's preferred level of social interaction, behavior in interpersonal situations, and optimism.</p>                          | <p><b>Assertiveness</b><br/>Influencing others and preferring to be in charge in social interactions and group activities.</p>                                                                  | <p><b>Taking Charge</b><br/>Seeks out positions of leadership as appropriate.</p>                                                                                   |
|                                                                                                                                                                                                   | <p><b>Optimism</b><br/>The degree to which a person expresses a positive mood and a positive outlook.</p>                                                                                       | <p><b>Influence</b><br/>Persuades others to agree with his or her ideas as appropriate.</p>                                                                         |
|                                                                                                                                                                                                   | <p><b>Sociability</b><br/>Seeking out and enjoying situations involving interpersonal interaction and building relationships with others.</p>                                                   | <p><b>Cheerful Mood</b><br/>Generally presents an upbeat and hopeful mood when interacting with others.</p>                                                         |
|                                                                                                                                                                                                   |                                                                                                                                                                                                 | <p><b>Positive Outlook</b><br/>Generally presents a positive view of situations.</p>                                                                                |
|                                                                                                                                                                                                   |                                                                                                                                                                                                 | <p><b>Interacting with Others</b><br/>Seeks out and actively participates in social activities when appropriate.</p>                                                |
|                                                                                                                                                                                                   |                                                                                                                                                                                                 | <p><b>Networking</b><br/>Maintains and expands his or her social group.</p>                                                                                         |
| <p><b>Getting Along with Others (Agreeableness)</b><br/>Describes the extent to which a person interacts positively and cooperates with others, and is generally kind, friendly, and tactful.</p> | <p><b>Cooperation</b><br/>Being respectful, polite, collaborative, and skilled at working through conflict with other people.</p>                                                               | <p><b>Respect for others</b><br/>Interacts with others in a polite and considerate manner.</p>                                                                      |
|                                                                                                                                                                                                   |                                                                                                                                                                                                 | <p><b>Collaboration</b><br/>Completes groups tasks and achieves group goals by effectively interacting with others.</p>                                             |
|                                                                                                                                                                                                   | <p><b>Perspective Taking</b><br/>Identifying, acknowledging, and understanding the emotions of others, showing concern for others, and considering the audience when providing information.</p> | <p><b>Conflict Management</b><br/>Works through conflicts and disagreements productively.</p>                                                                       |
|                                                                                                                                                                                                   |                                                                                                                                                                                                 | <p><b>Interpreting Emotional Reactions</b><br/>Responds appropriately to emotional reactions from others.</p>                                                       |
|                                                                                                                                                                                                   |                                                                                                                                                                                                 | <p><b>Showing Concern</b><br/>Demonstrates concern and compassion for others' feelings.</p>                                                                         |
|                                                                                                                                                                                                   | <p><b>Goodwill</b><br/>Assuming others have good intentions, trusting others, being able to forgive and not holding grudges.</p>                                                                | <p><b>Considering the Audience</b><br/>Considers others' feelings and points of view when communicating information.</p>                                            |
|                                                                                                                                                                                                   | <p><b>Forgiveness</b><br/>Continues to work or interact with others even after others have wronged (e.g., deceived, hurt) him or her as appropriate.</p>                                        |                                                                                                                                                                     |

|                                                                                                                                                                 |                                                                                                                                                      |                                                                                                                                                                                                  |
|-----------------------------------------------------------------------------------------------------------------------------------------------------------------|------------------------------------------------------------------------------------------------------------------------------------------------------|--------------------------------------------------------------------------------------------------------------------------------------------------------------------------------------------------|
|                                                                                                                                                                 |                                                                                                                                                      | <p><b>Trust</b><br/>Interactions with others are influenced by a belief that others generally have good intentions (e.g., others are usually honest and will do what they say they will do).</p> |
|                                                                                                                                                                 | <p><b>Helpfulness</b><br/>Helping others and being generous with his/her time and/or resources despite personal cost.</p>                            | <p><b>Assisting Others</b><br/>Helps others as needed.</p>                                                                                                                                       |
|                                                                                                                                                                 |                                                                                                                                                      | <p><b>Selflessness</b><br/>Shows generosity in sharing time and resources with others despite the impact it may have on him or herself.</p>                                                      |
|                                                                                                                                                                 | <p><b>Patience</b><br/>Tolerating frustrations presented by others or by situations without expressing irritation or hostility.</p>                  | <p><b>Tolerating Frustrations with Others</b><br/>Effectively deals with disappointment, annoyances, and setbacks related to others' actions without showing irritation or anger.</p>            |
|                                                                                                                                                                 |                                                                                                                                                      | <p><b>Tolerating Situational Frustrations</b><br/>Effectively deals with disappointment, annoyances, and setbacks related to situational factors without showing irritation or anger.</p>        |
| <p><b>Sustaining Effort (Conscientiousness)</b><br/>Describes a person's level of diligence, effort, organization, self-control, and compliance with rules.</p> | <p><b>Dependability</b><br/>Reliably fulfilling responsibilities, meeting deadlines, and producing quality work.</p>                                 | <p><b>Timeliness</b><br/>Follows a predetermined schedule for appointments/classes and tasks.</p>                                                                                                |
|                                                                                                                                                                 |                                                                                                                                                      | <p><b>Follow Through</b><br/>Meets commitments and works on tasks until they are complete.</p>                                                                                                   |
|                                                                                                                                                                 |                                                                                                                                                      | <p><b>Quality</b><br/>Submits high quality work.</p>                                                                                                                                             |
|                                                                                                                                                                 | <p><b>Order</b><br/>Planning and organizing tasks and materials, creating schedules, monitoring progress, and paying close attention to details.</p> | <p><b>Organization</b><br/>Uses a systematic approach to organize tasks and materials.</p>                                                                                                       |
|                                                                                                                                                                 |                                                                                                                                                      | <p><b>Planning</b><br/>Creates and follows appropriate schedules or timelines for tasks.</p>                                                                                                     |
|                                                                                                                                                                 |                                                                                                                                                      | <p><b>Monitoring</b><br/>Checks to make sure progress is being made toward the completion of tasks.</p>                                                                                          |
|                                                                                                                                                                 | <p><b>Persistence</b><br/>Working hard, making progress on relevant tasks, and maintaining focus despite setbacks or difficulties.</p>               | <p><b>Overcoming Challenges</b><br/>Continues to work on tasks despite the difficulty level, the presence of significant obstacles, or previous setbacks.</p>                                    |
|                                                                                                                                                                 |                                                                                                                                                      | <p><b>Maintaining Effort</b><br/>Puts in the time and sustained energy needed to successfully complete a task.</p>                                                                               |
|                                                                                                                                                                 |                                                                                                                                                      | <p><b>Focusing</b><br/>Maintains attention on the current activity despite the nature of the task or distractions.</p>                                                                           |
|                                                                                                                                                                 | <p><b>Rule Consciousness</b><br/>Following rules and procedures and complying with authority.</p>                                                    | <p><b>Compliance</b><br/>Follows instructions, procedures, and rules.</p>                                                                                                                        |
|                                                                                                                                                                 | <p><b>Respect for Rules/Authority</b><br/>Shows respect and appreciation for authority figures and rules</p>                                         |                                                                                                                                                                                                  |

|                                                                                                                                        |                                                                                                                                                                       |
|----------------------------------------------------------------------------------------------------------------------------------------|-----------------------------------------------------------------------------------------------------------------------------------------------------------------------|
| <p><b>Goal Striving</b><br/>Setting challenging goals, doing tasks without being told, and working to improve or learn new skills.</p> | <p><b>Self Improvement</b><br/>Works hard to become more effective by learning new skills/knowledge or improving existing skills.</p>                                 |
|                                                                                                                                        | <p><b>Initiative</b><br/>Takes action without being asked to do so.</p>                                                                                               |
|                                                                                                                                        | <p><b>Goal Setting</b><br/>Sets high but achievable goals for self-improvement and advancement.</p>                                                                   |
| <p><b>Self Control</b><br/>Managing impulses and weighing the consequences of one’s behavior before acting.</p>                        | <p><b>Restraint</b><br/>Resists the impulse to act on desire.</p>                                                                                                     |
|                                                                                                                                        | <p><b>Thinking before acting</b><br/>Takes the time to consider his or her options, potential consequences, and steps that need to be taken before taking action.</p> |
